# Supplementary material for: Factors Associated with Covid-19 Severity and Mortality among Hispanic Patients Living on the Usa-Mexico Border
Source: HighWire-hosted journal article supplement (doi:10.1136/jim-2020-001667), 2021-01-29
Supplement: jim-2020-001667supp001_data_supplement.pdf [file jim-2020-001667supp001_data_supplement.pdf]

**Supplementary Table 1. Unadjusted association between hospitalization and selected co-factors.**

| Factor<br>N                                  | Hospitalization         |                         | p-value          |
|----------------------------------------------|-------------------------|-------------------------|------------------|
|                                              | No<br>21                | Yes<br>61               |                  |
| Age, mean (SD)                               | 45.71 (14.38)           | 58.16 (17.34)           | <b>0.004</b>     |
| BMI, mean (SD)                               | 29.17 (4.63)            | 30.08 (5.94)            | <b>0.55</b>      |
| Maximum body temperature recorded, mean (SD) | 37.32 (0.59)            | 38.57 (1.09)            | <b>&lt;0.001</b> |
| Respiratory rate (highest), mean (SD)        | 18.44 (1.82)            | 36.90 (19.04)           | <b>&lt;0.001</b> |
| Systolic, mean (SD)                          | 119.69 (19.11)          | 91.32 (27.64)           | <b>&lt;0.001</b> |
| Diastolic, mean (SD)                         | 71.44 (11.26)           | 52.13 (15.42)           | <b>&lt;0.001</b> |
| Lowest SpO2 recorded, mean (SD)              | 94.44 (1.75)            | 78.64 (18.32)           | <b>&lt;0.001</b> |
| Hb, mean (SD)                                | 14.28 (2.08)            | 12.26 (3.07)            | <b>0.028</b>     |
| WBC count, median (IQR)                      | 5.58 (5.05, 7.77)       | 9.61 (4.97, 14.21)      | <b>0.20</b>      |
| Lymphocyte count, median (IQR)               | 1.30 (0.98, 1.62)       | 0.69 (0.49, 1.07)       | <b>0.009</b>     |
| Platelet count , median (IQR)                | 215.00 (196.00, 279.00) | 244.00 (167.00, 390.00) | 0.42             |
| LDH, mean (SD)                               | NA                      | 641.77 (1325.41)        |                  |
| CRP, mean (SD)                               | NA                      | 11.82 (6.07)            |                  |
| Procalcitonin, mean (SD)                     | 0.05 (.)                | 1.49 (4.42)             |                  |
| Lactic acid , mean (SD)                      | 3.20 (.)                | 3.59 (7.09)             |                  |
| HCO3, mean (SD)                              | 23.14 (2.57)            | 22.18 (11.83)           | 0.76             |
| AST, median (IQR)                            | 34.00 (24.00, 50.00)    | 65.00 (44.00, 114.50)   | <b>0.004</b>     |
| ALT, median (IQR)                            | 32.00 (22.00, 43.00)    | 46.50 (31.00, 83.00)    | 0.14             |
| INR, mean (SD)                               | 1.00 (.)                | 1.68 (1.91)             | 0.73             |
| PTT, mean (SD)                               | 26.00 (.)               | 37.51 (22.89)           | 0.63             |
| Bil total, median (IQR)                      | 0.75 (0.60, 0.90)       | 0.80 (0.60, 1.10)       | 0.52             |
| CK, mean (SD)                                | . (.)                   | 150.00 (180.32)         |                  |
| Na, mean (SD)                                | 137.29 (3.87)           | 133.24 (18.14)          | 0.41             |
| K , median (IQR)                             | 4.10 (3.90, 4.20)       | 4.40 (3.60, 5.00)       | 0.32             |
| Cl, median (IQR)                             | 103.50 (100.00, 105.00) | 104.00 (96.00, 109.00)  | 0.74             |
| D-Dimer, mean (SD)                           | . (.)                   | 43.93 (285.29)          |                  |
| PRO-BNP, mean (SD)                           | 49.00 (.)               | 21666.63 (46063.72)     | 0.66             |
| Lipase, mean (SD)                            | . (.)                   | 1564.70 (2866.79)       |                  |
| TROPONIN, mean (SD)                          | 0.01 (0.00)             | 0.53 (2.93)             | 0.57             |
| pH, mean (SD)                                | . (.)                   | 7.32 (0.17)             |                  |
| PO2, mean (SD)                               | . (.)                   | 59.44 (22.98)           |                  |
| PCO2, mean (SD)                              | . (.)                   | 43.17 (22.24)           |                  |
| Sex                                          |                         |                         | 0.30             |
| F                                            | 11 (52.4%)              | 24 (39.3%)              |                  |
| M                                            | 10 (47.6%)              | 37 (60.7%)              |                  |

|                                                 |            |            |              |
|-------------------------------------------------|------------|------------|--------------|
| Pregnancy                                       | 0 (0.0%)   | 2 (3.3%)   | 0.40         |
| Current smokers                                 | 1 (4.8%)   | 3 (4.9%)   | 0.98         |
| Drug use                                        | 0 (0.0%)   | 3 (4.9%)   | 0.30         |
| IVDU                                            | 0 (0.0%)   | 1 (1.6%)   | 0.55         |
| Alcoholic                                       | 0 (0.0%)   | 3 (5.0%)   | 0.30         |
| Recent travel to infected region                | 5 (23.8%)  | 18 (29.5%) | 0.62         |
| Recent contact with COVID-19 + case             | 3 (14.3%)  | 14 (23.0%) | 0.40         |
| Duration between exposure and symptoms if known |            |            | 0.20         |
| 0                                               | 20 (95.2%) | 60 (98.4%) |              |
| 2                                               | 1 (4.8%)   | 0 (0.0%)   |              |
| 7                                               | 0 (0.0%)   | 1 (1.6%)   |              |
| Any positive family member/roommate             | 5 (23.8%)  | 11 (18.0%) | 0.56         |
| Any episode of fever                            | 10 (47.6%) | 50 (82.0%) | <b>0.002</b> |
| What was the first started symptom?             |            |            | 0.63         |
| AMS                                             | 0 (0.0%)   | 1 (1.6%)   |              |
| Anosmia                                         | 1 (4.8%)   | 0 (0.0%)   |              |
| Cough                                           | 0 (0.0%)   | 1 (1.6%)   |              |
| Hypoxia                                         | 0 (0.0%)   | 1 (1.6%)   |              |
| SOB                                             | 1 (4.8%)   | 2 (3.3%)   |              |
| Shortness of breath                             | 1 (4.8%)   | 6 (9.8%)   |              |
| abdominal pain                                  | 0 (0.0%)   | 1 (1.6%)   |              |
| anosmia and ageusia                             | 0 (0.0%)   | 1 (1.6%)   |              |
| body aches                                      | 1 (4.8%)   | 0 (0.0%)   |              |
| coffee-ground emesis                            | 0 (0.0%)   | 1 (1.6%)   |              |
| cough                                           | 6 (28.6%)  | 10 (16.4%) |              |
| cough & headache                                | 0 (0.0%)   | 1 (1.6%)   |              |
| cough and SOB                                   | 0 (0.0%)   | 1 (1.6%)   |              |
| cough and fever                                 | 0 (0.0%)   | 1 (1.6%)   |              |
| cough or fever                                  | 0 (0.0%)   | 1 (1.6%)   |              |
| diarrhea                                        | 0 (0.0%)   | 1 (1.6%)   |              |
| dry cough                                       | 0 (0.0%)   | 1 (1.6%)   |              |
| epigastric pain                                 | 0 (0.0%)   | 1 (1.6%)   |              |
| fatigue                                         | 0 (0.0%)   | 2 (3.3%)   |              |
| fatigue/weakness                                | 0 (0.0%)   | 1 (1.6%)   |              |
| fever                                           | 2 (9.5%)   | 2 (3.3%)   |              |
| itchy throat                                    | 1 (4.8%)   | 0 (0.0%)   |              |
| left-sided weakness                             | 0 (0.0%)   | 1 (1.6%)   |              |
| loss of taste and smell                         | 1 (4.8%)   | 0 (0.0%)   |              |
| nasal congestion                                | 0 (0.0%)   | 1 (1.6%)   |              |
| productive cough                                | 0 (0.0%)   | 1 (1.6%)   |              |
| sore throat                                     | 1 (4.8%)   | 0 (0.0%)   |              |
| throat pain                                     | 1 (4.8%)   | 0 (0.0%)   |              |
| weakness                                        | 0 (0.0%)   | 1 (1.6%)   |              |
| weakness/fatigue                                | 0 (0.0%)   | 1 (1.6%)   |              |

|                         |             |             |                  |
|-------------------------|-------------|-------------|------------------|
|                         | 5 (23.8%)   | 20 (32.8%)  |                  |
| N_symptoms, mean (SD)   | 4.29 (2.74) | 4.82 (2.97) | 0.47             |
| Conjunctival congestion |             |             |                  |
| No                      | 21 (100.0%) | 61 (100.0%) |                  |
| Nasal congestion        | 8 (38.1%)   | 4 (6.6%)    | <b>&lt;0.001</b> |
| Rhinorrhea              | 0 (0.0%)    | 3 (4.9%)    | 0.30             |
| Headache                | 8 (38.1%)   | 18 (30.0%)  | 0.49             |
| Cough                   | 14 (66.7%)  | 41 (67.2%)  | 0.96             |
| Sore throat             | 7 (33.3%)   | 11 (18.0%)  | 0.14             |
| Sputum production       | 3 (14.3%)   | 8 (13.1%)   | 0.89             |
| Fatigue                 | 6 (28.6%)   | 31 (50.8%)  | 0.077            |
| Hemoptysis              | 0 (0.0%)    | 1 (1.6%)    | 0.55             |
| Shortness of breath     | 10 (47.6%)  | 45 (73.8%)  | <b>0.028</b>     |
| chest pain              | 5 (23.8%)   | 19 (31.1%)  | 0.52             |
| chest discomfort        | 0 (0.0%)    | 12 (19.7%)  | <b>0.028</b>     |
| abdominal pain          | 0 (0.0%)    | 8 (13.1%)   | 0.081            |
| Nausea or vomiting      | 4 (19.0%)   | 23 (37.7%)  | 0.12             |
| Diarrhea                | 3 (14.3%)   | 17 (28.3%)  | 0.20             |
| Myalgia or arthralgia   | 9 (42.9%)   | 21 (34.4%)  | 0.49             |
| Chill                   | 7 (33.3%)   | 20 (32.8%)  | 0.96             |
| loss of taste           | 3 (14.3%)   | 6 (9.8%)    | 0.57             |
| loss of smell           | 3 (14.3%)   | 6 (9.8%)    | 0.57             |
| N_signs, mean (SD)      | 0.29 (0.64) | 0.56 (0.65) | 0.10             |
| N_signs                 |             |             | 0.038            |
| 0                       | 17 (81.0%)  | 32 (52.5%)  |                  |
| 1                       | 2 (9.5%)    | 24 (39.3%)  |                  |
| 2                       | 2 (9.5%)    | 5 (8.2%)    |                  |
| Throat congestion       | 3 (14.3%)   | 0 (0.0%)    | <b>0.003</b>     |
| Tonsil swelling         | 1 (4.8%)    | 3 (4.9%)    | 0.98             |
| Rash                    | 1 (4.8%)    | 2 (3.3%)    | 0.75             |
| Abnormal lung sounds    | 0 (0.0%)    | 27 (45.8%)  | <b>&lt;0.001</b> |
| N_chronic, mean (SD)    | 0.67 (0.91) | 1.67 (1.33) | <b>0.002</b>     |
| N_chronic               |             |             | 0.062            |
| 0                       | 12 (57.1%)  | 15 (24.6%)  |                  |
| 1                       | 5 (23.8%)   | 11 (18.0%)  |                  |
| 2                       | 3 (14.3%)   | 22 (36.1%)  |                  |
| 3                       | 1 (4.8%)    | 7 (11.5%)   |                  |
| 4                       | 0 (0.0%)    | 4 (6.6%)    |                  |
| 5                       | 0 (0.0%)    | 2 (3.3%)    |                  |
| N_chronic1              |             |             | 0.017            |
| 0                       | 12 (57.1%)  | 15 (24.6%)  |                  |
| 1                       | 5 (23.8%)   | 11 (18.0%)  |                  |
| 2                       | 3 (14.3%)   | 22 (36.1%)  |                  |
| 33                      | 1 (4.8%)    | 13 (21.3%)  |                  |
| COPD                    | 0 (0.0%)    | 2 (3.3%)    | 0.40             |

|                             |             |            |                  |
|-----------------------------|-------------|------------|------------------|
| DM                          | 2 (9.5%)    | 30 (49.2%) | <b>0.001</b>     |
| HTN                         | 6 (28.6%)   | 34 (55.7%) | <b>0.032</b>     |
| Coronary artery disease     | 0 (0.0%)    | 8 (13.1%)  | 0.081            |
| Cerebrovascular disease     | 1 (4.8%)    | 5 (8.2%)   | 0.60             |
| Cancer                      | 0 (0.0%)    | 1 (1.6%)   | 0.55             |
| CKD                         | 0 (0.0%)    | 7 (11.5%)  | 0.10             |
| Cirrhosis                   | 0 (0.0%)    | 1 (1.6%)   | 0.55             |
| Asthma                      | 1 (4.8%)    | 3 (4.9%)   | 0.98             |
| Rheumatological             | 1 (4.8%)    | 0 (0.0%)   | 0.086            |
| IBD                         | 0 (0.0%)    | 1 (1.6%)   | 0.55             |
| HIV+                        | 0 (0.0%)    | 1 (1.6%)   | 0.55             |
| Hepatitis                   | 0 (0.0%)    | 2 (3.3%)   | 0.40             |
| Hypothyroidism              | 3 (15.0%)   | 7 (11.5%)  | 0.68             |
| Hyperthyroidism             |             |            |                  |
| 0                           | 21 (100.0%) | 60 (98.4%) |                  |
|                             | 0 (0.0%)    | 1 (1.6%)   |                  |
| Ground-glass opacities      |             |            | <b>&lt;0.001</b> |
| 0                           | 10 (47.6%)  | 21 (34.4%) |                  |
| 1                           | 4 (19.0%)   | 38 (62.3%) |                  |
| 99                          | 7 (33.3%)   | 2 (3.3%)   |                  |
| Local patchy shadowing      |             |            | <b>&lt;0.001</b> |
| 0                           | 11 (52.4%)  | 29 (47.5%) |                  |
| 1                           | 3 (14.3%)   | 30 (49.2%) |                  |
| 99                          | 7 (33.3%)   | 2 (3.3%)   |                  |
| Diffuse patchy shadowing    |             |            | <b>&lt;0.001</b> |
| 0                           | 13 (61.9%)  | 31 (50.8%) |                  |
| 1                           | 1 (4.8%)    | 28 (45.9%) |                  |
| 99                          | 7 (33.3%)   | 2 (3.3%)   |                  |
| Pleural effusion            |             |            | <b>&lt;0.001</b> |
| 0                           | 13 (61.9%)  | 42 (68.9%) |                  |
| 1                           | 1 (4.8%)    | 17 (27.9%) |                  |
| 99                          | 7 (33.3%)   | 2 (3.3%)   |                  |
| Interstitial abnormalities  |             |            | <b>0.001</b>     |
| 0                           | 13 (61.9%)  | 26 (42.6%) |                  |
| 1                           | 1 (4.8%)    | 29 (47.5%) |                  |
| na                          | 7 (33.3%)   | 4 (6.6%)   |                  |
| CT_Ground-glass opacities   |             |            | <b>0.048</b>     |
| 1                           | 1 (4.8%)    | 15 (24.6%) |                  |
| na                          | 20 (95.2%)  | 46 (75.4%) |                  |
| CT_Local patchy shadowing   |             |            | 0.23             |
| 0                           | 0 (0.0%)    | 6 (9.8%)   |                  |
| 1                           | 1 (4.8%)    | 6 (9.8%)   |                  |
| na                          | 20 (95.2%)  | 49 (80.3%) |                  |
| CT_Diffuse patchy shadowing |             |            | 0.28             |
| 0                           | 1 (4.8%)    | 6 (9.8%)   |                  |

|                               |             |             |                  |
|-------------------------------|-------------|-------------|------------------|
| 1                             | 0 (0.0%)    | 5 (8.2%)    |                  |
| na                            | 20 (95.2%)  | 50 (82.0%)  |                  |
| CT_Pleural effusion           |             |             | <b>0.15</b>      |
| 0                             | 1 (4.8%)    | 6 (9.8%)    |                  |
| 1                             | 0 (0.0%)    | 8 (13.1%)   |                  |
| na                            | 20 (95.2%)  | 47 (77.0%)  |                  |
| CT_Interstitial abnormalities |             |             | 0.28             |
| 0                             | 1 (4.8%)    | 6 (9.8%)    |                  |
| 1                             | 0 (0.0%)    | 7 (11.5%)   |                  |
| 60                            | 0 (0.0%)    | 1 (1.6%)    |                  |
| na                            | 20 (95.2%)  | 47 (77.0%)  |                  |
| N_med, mean (SD)              | 0.86 (1.15) | 3.05 (2.12) | <b>&lt;0.001</b> |
| N_med                         |             |             | <b>0.005</b>     |
| 0                             | 11 (52.4%)  | 6 (9.8%)    |                  |
| 1                             | 5 (23.8%)   | 12 (19.7%)  |                  |
| 2                             | 3 (14.3%)   | 10 (16.4%)  |                  |
| 3                             | 1 (4.8%)    | 5 (8.2%)    |                  |
| 4                             | 1 (4.8%)    | 14 (23.0%)  |                  |
| 5                             | 0 (0.0%)    | 7 (11.5%)   |                  |
| 6                             | 0 (0.0%)    | 4 (6.6%)    |                  |
| 7                             | 0 (0.0%)    | 2 (3.3%)    |                  |
| 10                            | 0 (0.0%)    | 1 (1.6%)    |                  |
| N_med1                        |             |             | <b>&lt;0.001</b> |
| 0                             | 11 (52.4%)  | 6 (9.8%)    |                  |
| 1                             | 5 (23.8%)   | 12 (19.7%)  |                  |
| 2                             | 3 (14.3%)   | 10 (16.4%)  |                  |
| 3                             | 1 (4.8%)    | 5 (8.2%)    |                  |
| 4                             | 1 (4.8%)    | 14 (23.0%)  |                  |
| 5                             | 0 (0.0%)    | 14 (23.0%)  |                  |
| Remdesivir                    | 0 (0.0%)    | 4 (6.6%)    | 0.23             |
| Hydroxychloroquine            | 0 (0.0%)    | 15 (24.6%)  | <b>0.012</b>     |
| azithromycin                  | 10 (47.6%)  | 44 (72.1%)  | <b>0.041</b>     |
| Statin                        | 2 (9.5%)    | 22 (36.1%)  | <b>0.021</b>     |
| Corticosteroid                | 3 (14.3%)   | 22 (36.1%)  | <b>0.061</b>     |
| ACEi/ARB                      | 2 (9.5%)    | 8 (13.1%)   | 0.66             |
| Vit C                         | 1 (4.8%)    | 23 (37.7%)  | <b>0.004</b>     |
| Zinc                          | 0 (0.0%)    | 21 (34.4%)  | <b>0.002</b>     |
| Vitamin D                     | 0 (0.0%)    | 14 (23.0%)  | <b>0.016</b>     |
| Vasopressors                  | 0 (0.0%)    | 9 (14.8%)   | 0.062            |
| Tocilizumab                   | 0 (0.0%)    | 2 (3.3%)    | 0.40             |
| convalescent plasma           | 0 (0.0%)    | 2 (3.3%)    | 0.40             |

SD: standard deviation; IQR: Inter-quartile range

**Suppl. Table 2. Unadjusted association between mortality and cofactors.**

| Factor<br>N                                  | Death              |                    | p-value          |
|----------------------------------------------|--------------------|--------------------|------------------|
|                                              | No<br>67           | Yes<br>15          |                  |
| Age, mean (SD)                               | 51.67 (16.65)      | 69.73 (12.81)      | <b>&lt;0.001</b> |
| BMI, mean (SD)                               | 29.87 (5.16)       | 29.86 (7.60)       | 1.00             |
| Maximum body temperature recorded, mean (SD) | 38.02 (0.91)       | 39.47 (1.21)       | <b>&lt;0.001</b> |
| Respiratory rate (highest), mean (SD)        | 26.66 (13.34)      | 58.87 (13.55)      | <b>&lt;0.001</b> |
| Systolic, mean (SD)                          | 105.77 (22.59)     | 62.80 (23.72)      | <b>&lt;0.001</b> |
| Diastolic, mean (SD)                         | 61.10 (12.74)      | 36.27 (15.73)      | <b>&lt;0.001</b> |
| Lowest SpO2 recorded, mean (SD)              | 87.58 (11.07)      | 58.53 (20.14)      | <b>&lt;0.001</b> |
| Hb, mean (SD)                                | 13.06 (3.02)       | 10.88 (2.35)       | <b>0.011</b>     |
|                                              |                    | 16.05 (11.88,      |                  |
| WBC count, median (IQR)                      | 6.93 (4.45, 11.43) | 29.00)             | <b>&lt;0.001</b> |
| Lymphocyte count, median (IQR)               | 0.86 (0.60, 1.30)  | 0.51 (0.37, 0.69)  | <b>&lt;0.001</b> |
|                                              | 236.00 (176.00,    | 305.00 (114.00,    |                  |
| Platelet count , median (IQR)                | 334.00)            | 474.00)            | 0.89             |
|                                              | 353.00 (237.00,    | 677.00 (653.00,    |                  |
| LDH, median (IQR)                            | 447.00)            | 952.00)            | <b>&lt;0.001</b> |
|                                              | 13.30 (5.90,       | 18.00 (11.05,      |                  |
| CRP, median (IQR)                            | 17.30)             | 18.00)             | <b>0.026</b>     |
| Procalcitonin, median (IQR)                  | 0.11 (0.05, 0.23)  | 0.33 (0.16, 0.52)  | <b>0.022</b>     |
| Lactic acid , median (IQR)                   | 1.15 (0.80, 2.00)  | 3.15 (1.60, 5.80)  | <b>0.004</b>     |
| HCO3, mean (SD)                              | 22.61 (10.65)      | 21.40 (11.19)      | 0.70             |
|                                              | 53.50 (34.00,      | 136.00 (74.00,     |                  |
| AST, median (IQR)                            | 72.00)             | 376.00)            | <b>&lt;0.001</b> |
|                                              | 42.50 (22.00,      | 83.00 (40.00,      |                  |
| ALT, median (IQR)                            | 65.00)             | 157.00)            | <b>0.011</b>     |
| INR , median (IQR)                           | 1.20 (1.10, 1.30)  | 1.40 (1.20, 1.50)  | <b>0.042</b>     |
|                                              | 31.00 (24.70,      | 41.30 (33.10,      |                  |
| PTT, median (IQR)                            | 33.40)             | 88.10)             | <b>0.007</b>     |
| Bil total, median (IQR)                      | 0.75 (0.60, 1.00)  | 0.90 (0.70, 2.20)  | <b>0.025</b>     |
| CK, mean (SD)                                | 150.00 (180.32)    | . (.)              |                  |
| Na, mean (SD)                                | 132.28 (17.24)     | 140.87 (11.08)     | <b>0.071</b>     |
| K , median (IQR)                             | 4.10 (3.65, 4.70)  | 5.40 (3.50, 6.30)  | <b>0.037</b>     |
|                                              | 103.00 (97.00,     | 112.00 (95.00,     |                  |
| Cl, median (IQR)                             | 107.00)            | 115.00)            | <b>0.008</b>     |
| D-Dimer, median (IQR)                        | 1.10 (0.63, 2.20)  | 3.80 (2.63, 11.23) | <b>0.002</b>     |
|                                              | 299.50 (106.00,    | 1010.00 (489.00,   |                  |
| PRO-BNP, median (IQR)                        | 887.00)            | 28700.00)          | 0.20             |
| Lipase, mean (SD)                            | 169.72 (142.66)    | 4819.67 (3770.82)  | <b>0.007</b>     |
| TROPONIN, median (IQR)                       | 0.01 (0.01, 0.01)  | 0.03 (0.01, 0.11)  | <b>0.002</b>     |
| pH, mean (SD)                                | 7.40 (0.09)        | 7.24 (0.19)        | <b>0.009</b>     |

|                                                 |                      |                      |              |
|-------------------------------------------------|----------------------|----------------------|--------------|
| PO2, median (IQR)                               | 61.20 (55.30, 70.50) | 47.60 (46.30, 61.80) | 0.36         |
| PCO2, median (IQR)                              | 32.70 (28.60, 39.50) | 55.80 (33.20, 60.50) | <b>0.060</b> |
| Sex                                             |                      |                      | 0.17         |
| F                                               | 31 (46.3%)           | 4 (26.7%)            |              |
| M                                               | 36 (53.7%)           | 11 (73.3%)           |              |
| Pregnancy                                       | 2 (3.0%)             | 0 (0.0%)             | 0.50         |
| Current smokers                                 | 4 (6.0%)             | 0 (0.0%)             | 0.33         |
| Drug use                                        | 3 (4.5%)             | 0 (0.0%)             | 0.40         |
| IVDU                                            | 1 (1.5%)             | 0 (0.0%)             | 0.63         |
| Alcoholic                                       | 2 (3.0%)             | 1 (6.7%)             | 0.50         |
| Recent travel to infected region                | 18 (26.9%)           | 5 (33.3%)            | 0.61         |
| Recent contact with COVID-19 + case             | 12 (17.9%)           | 5 (33.3%)            | 0.18         |
| Duration between exposure and symptoms if known |                      |                      | 0.79         |
| 0                                               | 65 (97.0%)           | 15 (100.0%)          |              |
| 2                                               | 1 (1.5%)             | 0 (0.0%)             |              |
| 7                                               | 1 (1.5%)             | 0 (0.0%)             |              |
| Any positive family member/roommate             | 13 (19.4%)           | 3 (20.0%)            | 0.96         |
| Any episode of fever                            | 47 (70.1%)           | 13 (86.7%)           | 0.19         |
| What was the first started symptom?             |                      |                      | 0.23         |
| AMS                                             | 1 (1.5%)             | 0 (0.0%)             |              |
| Anosmia                                         | 1 (1.5%)             | 0 (0.0%)             |              |
| Cough                                           | 1 (1.5%)             | 0 (0.0%)             |              |
| Hypoxia                                         | 0 (0.0%)             | 1 (6.7%)             |              |
| SOB                                             | 2 (3.0%)             | 1 (6.7%)             |              |
| Shortness of breath                             | 5 (7.5%)             | 2 (13.3%)            |              |
| abdominal pain                                  | 0 (0.0%)             | 1 (6.7%)             |              |
| anosmia and ageusia                             | 1 (1.5%)             | 0 (0.0%)             |              |
| body aches                                      | 1 (1.5%)             | 0 (0.0%)             |              |
| coffee-ground emesis                            | 0 (0.0%)             | 1 (6.7%)             |              |
| cough                                           | 15 (22.4%)           | 1 (6.7%)             |              |
| cough & headache                                | 1 (1.5%)             | 0 (0.0%)             |              |
| cough and SOB                                   | 1 (1.5%)             | 0 (0.0%)             |              |
| cough and fever                                 | 0 (0.0%)             | 1 (6.7%)             |              |
| cough or fever                                  | 1 (1.5%)             | 0 (0.0%)             |              |
| diarrhea                                        | 1 (1.5%)             | 0 (0.0%)             |              |
| dry cough                                       | 1 (1.5%)             | 0 (0.0%)             |              |
| epigastric pain                                 | 1 (1.5%)             | 0 (0.0%)             |              |
| fatigue                                         | 2 (3.0%)             | 0 (0.0%)             |              |
| fatigue/weakness                                | 1 (1.5%)             | 0 (0.0%)             |              |
| fever                                           | 3 (4.5%)             | 1 (6.7%)             |              |
| itchy throat                                    | 1 (1.5%)             | 0 (0.0%)             |              |
| left-sided weakness                             | 0 (0.0%)             | 1 (6.7%)             |              |
| loss of taste and smell                         | 1 (1.5%)             | 0 (0.0%)             |              |

|                         |             |             |              |
|-------------------------|-------------|-------------|--------------|
| nasal congestion        | 1 (1.5%)    | 0 (0.0%)    |              |
| productive cough        | 1 (1.5%)    | 0 (0.0%)    |              |
| sore throat             | 1 (1.5%)    | 0 (0.0%)    |              |
| throat pain             | 1 (1.5%)    | 0 (0.0%)    |              |
| weakness                | 0 (0.0%)    | 1 (6.7%)    |              |
| weakness/fatigue        | 0 (0.0%)    | 1 (6.7%)    |              |
|                         | 22 (32.8%)  | 3 (20.0%)   |              |
| N_symptoms, mean (SD)   | 5.13 (2.91) | 2.67 (1.91) | <b>0.002</b> |
| Conjunctival congestion |             |             |              |
| 0                       | 67 (100.0%) | 15 (100.0%) |              |
| Nasal congestion        | 12 (17.9%)  | 0 (0.0%)    | <b>0.076</b> |
| Rhinorrhea              | 3 (4.5%)    | 0 (0.0%)    | 0.40         |
| Headache                | 24 (36.4%)  | 2 (13.3%)   | 0.085        |
| Cough                   | 48 (71.6%)  | 7 (46.7%)   | 0.063        |
| Sore throat             | 17 (25.4%)  | 1 (6.7%)    | 0.11         |
| Sputum production       | 10 (14.9%)  | 1 (6.7%)    | 0.40         |
| Fatigue                 | 31 (46.3%)  | 6 (40.0%)   | 0.66         |
| Hemoptysis              | 1 (1.5%)    | 0 (0.0%)    | 0.63         |
| Shortness of breath     | 46 (68.7%)  | 9 (60.0%)   | 0.52         |
| chest pain              | 23 (34.3%)  | 1 (6.7%)    | <b>0.033</b> |
| chest discomfort        | 12 (17.9%)  | 0 (0.0%)    | 0.076        |
| abdominal pain          | 5 (7.5%)    | 3 (20.0%)   | <b>0.14</b>  |
| Nausea or vomiting      | 22 (32.8%)  | 5 (33.3%)   | 0.97         |
| Diarrhea                | 17 (25.8%)  | 3 (20.0%)   | 0.64         |
| Myalgia or arthralgia   | 29 (43.3%)  | 1 (6.7%)    | <b>0.008</b> |
| Chill                   | 26 (38.8%)  | 1 (6.7%)    | <b>0.017</b> |
| loss of taste           | 9 (13.4%)   | 0 (0.0%)    | 0.13         |
| loss of smell           | 9 (13.4%)   | 0 (0.0%)    | 0.13         |
| N_signs, mean (SD)      | 0.48 (0.68) | 0.53 (0.52) | 0.77         |
| N_signs                 |             |             | <b>0.091</b> |
| 0                       | 42 (62.7%)  | 7 (46.7%)   |              |
| 1                       | 18 (26.9%)  | 8 (53.3%)   |              |
| 2                       | 7 (10.4%)   | 0 (0.0%)    |              |
| Throat congestion       | 3 (4.5%)    | 0 (0.0%)    | 0.40         |
| Tonsil swelling         | 4 (6.0%)    | 0 (0.0%)    | 0.33         |
| Rash                    | 3 (4.5%)    | 0 (0.0%)    | 0.40         |
| Abnormal lung sounds    | 19 (29.2%)  | 8 (53.3%)   | 0.075        |
| N_chronic, mean (SD)    | 1.21 (1.27) | 2.33 (1.05) | <b>0.002</b> |
| N_chronic               |             |             | <b>0.008</b> |
| 0                       | 26 (38.8%)  | 1 (6.7%)    |              |
| 1                       | 15 (22.4%)  | 1 (6.7%)    |              |
| 2                       | 18 (26.9%)  | 7 (46.7%)   |              |
| 3                       | 4 (6.0%)    | 4 (26.7%)   |              |
| 4                       | 2 (3.0%)    | 2 (13.3%)   |              |
| 5                       | 2 (3.0%)    | 0 (0.0%)    |              |



|                            |             |            |                  |
|----------------------------|-------------|------------|------------------|
| N_chronic1                 |             |            | <b>0.006</b>     |
| 0                          | 26 (38.8%)  | 1 (6.7%)   |                  |
| 1                          | 15 (22.4%)  | 1 (6.7%)   |                  |
| 2                          | 18 (26.9%)  | 7 (46.7%)  |                  |
| 33                         | 8 (11.9%)   | 6 (40.0%)  |                  |
| COPD                       | 2 (3.0%)    | 0 (0.0%)   | 0.50             |
| DM                         | 21 (31.3%)  | 11 (73.3%) | <b>0.003</b>     |
| HTN                        | 29 (43.3%)  | 11 (73.3%) | <b>0.035</b>     |
| Coronary artery disease    | 5 (7.5%)    | 3 (20.0%)  | 0.14             |
| Cerebrovascular disease    | 4 (6.0%)    | 2 (13.3%)  | 0.32             |
| Cancer                     | 1 (1.5%)    | 0 (0.0%)   | 0.63             |
| CKD                        | 4 (6.0%)    | 3 (20.0%)  | 0.079            |
| Cirrhosis                  | 1 (1.5%)    | 0 (0.0%)   | 0.63             |
| Asthma                     | 3 (4.5%)    | 1 (6.7%)   | 0.72             |
| Rheumatological            | 1 (1.5%)    | 0 (0.0%)   | 0.63             |
| IBD                        | 0 (0.0%)    | 1 (6.7%)   | <b>0.033</b>     |
| HIV+                       | 0 (0.0%)    | 1 (6.7%)   | <b>0.033</b>     |
| Hepatitis                  | 2 (3.0%)    | 0 (0.0%)   | 0.50             |
| Hypothyroidism             | 8 (12.1%)   | 2 (13.3%)  | 0.90             |
| Hyperthyroidism            |             |            |                  |
| 0                          | 67 (100.0%) | 14 (93.3%) |                  |
|                            | 0 (0.0%)    | 1 (6.7%)   |                  |
| Ground-glass opacities     |             |            | <b>0.009</b>     |
| 0                          | 29 (43.3%)  | 2 (13.3%)  |                  |
| 1                          | 29 (43.3%)  | 13 (86.7%) |                  |
| 99                         | 9 (13.4%)   | 0 (0.0%)   |                  |
| Local patchy shadowing     |             |            | 0.29             |
| 0                          | 31 (46.3%)  | 9 (60.0%)  |                  |
| 1                          | 27 (40.3%)  | 6 (40.0%)  |                  |
| 99                         | 9 (13.4%)   | 0 (0.0%)   |                  |
| Diffuse patchy shadowing   |             |            | <b>&lt;0.001</b> |
| 0                          | 41 (61.2%)  | 3 (20.0%)  |                  |
| 1                          | 17 (25.4%)  | 12 (80.0%) |                  |
| 99                         | 9 (13.4%)   | 0 (0.0%)   |                  |
| Pleural effusion           |             |            | <b>&lt;0.001</b> |
| 0                          | 50 (74.6%)  | 5 (33.3%)  |                  |
| 1                          | 8 (11.9%)   | 10 (66.7%) |                  |
| 99                         | 9 (13.4%)   | 0 (0.0%)   |                  |
| Interstitial abnormalities |             |            | <b>&lt;0.001</b> |
| 0                          | 37 (55.2%)  | 2 (13.3%)  |                  |
| Undet                      | 1 (1.5%)    | 0 (0.0%)   |                  |
| 1                          | 17 (25.4%)  | 13 (86.7%) |                  |
| not mentioned              | 1 (1.5%)    | 0 (0.0%)   |                  |
| na                         | 11 (16.4%)  | 0 (0.0%)   |                  |
| CT_Ground-glass opacities  |             |            | 0.96             |

|                               |             |             |              |
|-------------------------------|-------------|-------------|--------------|
| 1                             | 13 (19.4%)  | 3 (20.0%)   |              |
| na                            | 54 (80.6%)  | 12 (80.0%)  |              |
| CT_Local patchy shadowing     |             |             | 0.76         |
| 0                             | 5 (7.5%)    | 1 (6.7%)    |              |
| 1                             | 5 (7.5%)    | 2 (13.3%)   |              |
| na                            | 57 (85.1%)  | 12 (80.0%)  |              |
| CT_Diffuse patchy shadowing   |             |             | 0.96         |
| 0                             | 6 (9.0%)    | 1 (6.7%)    |              |
| 1                             | 4 (6.0%)    | 1 (6.7%)    |              |
| na                            | 57 (85.1%)  | 13 (86.7%)  |              |
| CT_Pleural effusion           |             |             | 0.17         |
| 0                             | 7 (10.4%)   | 0 (0.0%)    |              |
| 1                             | 5 (7.5%)    | 3 (20.0%)   |              |
| na                            | 55 (82.1%)  | 12 (80.0%)  |              |
| CT_Interstitial abnormalities |             |             | 0.85         |
| 0                             | 5 (7.5%)    | 2 (13.3%)   |              |
| 1                             | 6 (9.0%)    | 1 (6.7%)    |              |
| 60                            | 1 (1.5%)    | 0 (0.0%)    |              |
| na                            | 55 (82.1%)  | 12 (80.0%)  |              |
| N_med, mean (SD)              | 2.36 (2.09) | 3.07 (2.37) | 0.25         |
| N_med                         |             |             | 0.14         |
| 0                             | 16 (23.9%)  | 1 (6.7%)    |              |
| 1                             | 15 (22.4%)  | 2 (13.3%)   |              |
| 2                             | 8 (11.9%)   | 5 (33.3%)   |              |
| 3                             | 5 (7.5%)    | 1 (6.7%)    |              |
| 4                             | 11 (16.4%)  | 4 (26.7%)   |              |
| 5                             | 6 (9.0%)    | 1 (6.7%)    |              |
| 6                             | 4 (6.0%)    | 0 (0.0%)    |              |
| 7                             | 2 (3.0%)    | 0 (0.0%)    |              |
| 10                            | 0 (0.0%)    | 1 (6.7%)    |              |
| N_med1                        |             |             | 0.25         |
| 0                             | 16 (23.9%)  | 1 (6.7%)    |              |
| 1                             | 15 (22.4%)  | 2 (13.3%)   |              |
| 2                             | 8 (11.9%)   | 5 (33.3%)   |              |
| 3                             | 5 (7.5%)    | 1 (6.7%)    |              |
| 4                             | 11 (16.4%)  | 4 (26.7%)   |              |
| 55                            | 12 (17.9%)  | 2 (13.3%)   |              |
| Remdesivir                    | 3 (4.5%)    | 1 (6.7%)    | 0.72         |
| Hydroxychloroquine            | 10 (14.9%)  | 5 (33.3%)   | 0.096        |
| azithromycin                  | 44 (65.7%)  | 10 (66.7%)  | 0.94         |
| Statin                        | 17 (25.4%)  | 7 (46.7%)   | 0.10         |
| Corticosteroid                | 21 (31.3%)  | 4 (26.7%)   | 0.72         |
| ACEi/ARB                      | 7 (10.4%)   | 3 (20.0%)   | 0.31         |
| Vit C                         | 23 (34.3%)  | 1 (6.7%)    | <b>0.033</b> |
| Zinc                          | 20 (29.9%)  | 1 (6.7%)    | <b>0.063</b> |

|                     |            |           |        |
|---------------------|------------|-----------|--------|
| Vitamin D           | 12 (17.9%) | 2 (13.3%) | 0.67   |
| Vasopressors        | 1 (1.5%)   | 8 (53.3%) | <0.001 |
| Tocilizumab         | 0 (0.0%)   | 2 (13.3%) | 0.002  |
| convalescent plasma | 0 (0.0%)   | 2 (13.3%) | 0.003  |

SD: standard deviation;

IQR: inter-quartile range

**Suppl. Table 3. Unadjusted association between ICU admission and selected cofactors.**

| Factor                                       | ICU admission           |                         | p-value          |
|----------------------------------------------|-------------------------|-------------------------|------------------|
|                                              | No                      | Yes                     |                  |
| N                                            | 62                      | 20                      |                  |
| Age, mean (SD)                               | 52.63 (17.87)           | 62.25 (13.97)           | <b>0.031</b>     |
| BMI, mean (SD)                               | 29.59 (5.31)            | 30.69 (6.63)            | 0.46             |
| Maximum body temperature recorded, mean (SD) | 37.95 (0.88)            | 39.31 (1.16)            | <b>&lt;0.001</b> |
| Respiratory rate (highest), mean (SD)        | 23.79 (7.72)            | 58.85 (15.12)           | <b>&lt;0.001</b> |
| Systolic, mean (SD)                          | 107.09 (22.34)          | 69.85 (25.99)           | <b>&lt;0.001</b> |
| Diastolic, mean (SD)                         | 62.20 (12.62)           | 39.40 (14.88)           | <b>&lt;0.001</b> |
| Lowest SpO2 recorded, mean (SD)              | 88.77 (7.36)            | 62.39 (22.96)           | <b>&lt;0.001</b> |
| Hb, mean (SD)                                | 13.36 (2.68)            | 10.61 (3.00)            | <b>&lt;0.001</b> |
| WBC count , median (IQR)                     | 6.77 (4.45, 9.61)       | 14.63 (11.88, 17.07)    | <b>&lt;0.001</b> |
| Lymphocyte count, median (IQR)               | 0.88 (0.59, 1.30)       | 0.59 (0.40, 0.80)       | <b>0.008</b>     |
| Platelet count , median (IQR)                | 224.00 (170.00, 322.00) | 315.00 (163.50, 458.50) | 0.16             |
| LDH, median (IQR)                            | 371.50 (282.50, 456.50) | 568.00 (336.00, 734.00) | 0.073            |
| CRP, median (IQR)                            | 10.85 (5.90, 16.40)     | 18.00 (7.50, 18.00)     | <b>0.025</b>     |
| Procalcitonin, median (IQR)                  | 0.09 (0.05, 0.18)       | 0.41 (0.21, 2.18)       | <b>&lt;0.001</b> |
| Lactic acid , median (IQR)                   | 1.10 (0.80, 1.80)       | 2.50 (1.50, 4.40)       | <b>0.006</b>     |
| HCO3, mean (SD)                              | 21.70 (4.29)            | 24.15 (19.58)           | 0.39             |
| AST, median (IQR)                            | 50.00 (33.00, 71.00)    | 84.50 (65.50, 237.50)   | <b>&lt;0.001</b> |
| ALT, median (IQR)                            | 39.00 (22.00, 74.00)    | 58.50 (41.50, 106.50)   | <b>0.022</b>     |
| INR , median (IQR)                           | 1.20 (1.10, 1.30)       | 1.30 (1.15, 1.40)       | 0.12             |
| PTT, median (IQR)                            | 30.95 (27.30, 32.75)    | 36.70 (33.10, 70.10)    | <b>0.031</b>     |
| Bil total, median (IQR)                      | 0.70 (0.60, 1.00)       | 0.90 (0.65, 1.80)       | 0.090            |
| CK, median (IQR)                             | 48.50 (40.00, 157.00)   | 99.00 (67.50, 383.50)   | 0.17             |
| Na, mean (SD)                                | 135.45 (5.39)           | 130.00 (30.89)          | 0.21             |
| K , median (IQR)                             | 4.10 (3.60, 4.70)       | 5.30 (3.60, 6.35)       | <b>0.008</b>     |

|                                                 |                         |                           |                  |
|-------------------------------------------------|-------------------------|---------------------------|------------------|
| Cl, median (IQR)                                | 103.00 (98.00, 108.00)  | 107.50 (91.00, 113.50)    | 0.75             |
| D-Dimer, median (IQR)                           | 1.02 (0.63, 1.74)       | 5.93 (2.65, 11.79)        | <b>&lt;0.001</b> |
| PRO-BNP, median (IQR)                           | 467.00 (131.00, 887.00) | 788.50 (304.00, 17690.00) | 0.56             |
| Lipase, mean (SD)                               | 263.14 (210.85)         | 4601.67 (4133.51)         | <b>0.016</b>     |
| TROPONIN, median (IQR)                          | 0.01 (0.01, 0.01)       | 0.03 (0.01, 0.16)         | <b>0.003</b>     |
| pH, mean (SD)                                   | 7.40 (0.10)             | 7.27 (0.19)               | <b>0.036</b>     |
| PO2, median (IQR)                               | 55.30 (27.90, 64.20)    | 59.90 (46.80, 77.80)      | 0.38             |
| PCO2, median (IQR)                              | 37.90 (32.20, 39.60)    | 39.30 (28.60, 59.30)      | 0.47             |
| Sex                                             |                         |                           | 0.42             |
| F                                               | 28 (45.2%)              | 7 (35.0%)                 |                  |
| M                                               | 34 (54.8%)              | 13 (65.0%)                |                  |
| Pregnancy                                       | 2 (3.2%)                | 0 (0.0%)                  | 0.42             |
| Current smokers                                 | 3 (4.8%)                | 1 (5.0%)                  | 0.98             |
| Drug use                                        | 2 (3.2%)                | 1 (5.0%)                  | 0.71             |
| IVDU                                            | 1 (1.6%)                | 0 (0.0%)                  | 0.57             |
| Alcoholic                                       | 2 (3.3%)                | 1 (5.0%)                  | 0.72             |
| Recent travel to infected region                | 17 (27.4%)              | 6 (30.0%)                 | 0.82             |
| Recent contact with COVID-19 + case             | 12 (19.4%)              | 5 (25.0%)                 | 0.59             |
| Duration between exposure and symptoms if known |                         |                           | 0.72             |
| 0                                               | 60 (96.8%)              | 20 (100.0%)               |                  |
| 2                                               | 1 (1.6%)                | 0 (0.0%)                  |                  |
| 7                                               | 1 (1.6%)                | 0 (0.0%)                  |                  |
| Any positive family member/roommate             | 14 (22.6%)              | 2 (10.0%)                 | 0.22             |
| Any episode of fever                            | 43 (69.4%)              | 17 (85.0%)                | 0.17             |
| What was the first started symptom?             |                         |                           | 0.45             |
| AMS                                             | 1 (1.6%)                | 0 (0.0%)                  |                  |
| Anosmia                                         | 1 (1.6%)                | 0 (0.0%)                  |                  |
| Cough                                           | 1 (1.6%)                | 0 (0.0%)                  |                  |
| Hypoxia                                         | 1 (1.6%)                | 0 (0.0%)                  |                  |
| SOB                                             | 2 (3.2%)                | 1 (5.0%)                  |                  |
| Shortness of breath                             | 4 (6.5%)                | 3 (15.0%)                 |                  |
| abdominal pain                                  | 0 (0.0%)                | 1 (5.0%)                  |                  |
| anosmia and ageusia                             | 1 (1.6%)                | 0 (0.0%)                  |                  |

|                       |             |             |       |
|-----------------------|-------------|-------------|-------|
| body aches            | 1 (1.6%)    | 0 (0.0%)    |       |
| coffee-ground         |             |             |       |
| emesis                | 1 (1.6%)    | 0 (0.0%)    |       |
| cough                 | 14 (22.6%)  | 2 (10.0%)   |       |
| cough & headache      | 1 (1.6%)    | 0 (0.0%)    |       |
| cough and SOB         | 1 (1.6%)    | 0 (0.0%)    |       |
| cough and fever       | 0 (0.0%)    | 1 (5.0%)    |       |
| cough or fever        | 1 (1.6%)    | 0 (0.0%)    |       |
| diarrhea              | 1 (1.6%)    | 0 (0.0%)    |       |
| dry cough             | 1 (1.6%)    | 0 (0.0%)    |       |
| epigastric pain       | 1 (1.6%)    | 0 (0.0%)    |       |
| fatigue               | 2 (3.2%)    | 0 (0.0%)    |       |
| fatigue/weakness      | 1 (1.6%)    | 0 (0.0%)    |       |
| fever                 | 3 (4.8%)    | 1 (5.0%)    |       |
| itchy throat          | 1 (1.6%)    | 0 (0.0%)    |       |
| left-sided            |             |             |       |
| weakness              | 0 (0.0%)    | 1 (5.0%)    |       |
| loss of taste and     |             |             |       |
| smell                 | 1 (1.6%)    | 0 (0.0%)    |       |
| nasal congestion      | 0 (0.0%)    | 1 (5.0%)    |       |
| productive cough      | 1 (1.6%)    | 0 (0.0%)    |       |
| sore throat           | 1 (1.6%)    | 0 (0.0%)    |       |
| throat pain           | 1 (1.6%)    | 0 (0.0%)    |       |
| weakness              | 0 (0.0%)    | 1 (5.0%)    |       |
| weakness/fatigue      | 0 (0.0%)    | 1 (5.0%)    |       |
|                       | 18 (29.0%)  | 7 (35.0%)   |       |
| N_symptoms, mean      |             |             |       |
| (SD)                  | 4.94 (2.90) | 3.90 (2.86) | 0.17  |
| Conjunctival          |             |             |       |
| congestion            |             |             |       |
| 0                     | 62 (100.0%) | 20 (100.0%) |       |
| Nasal congestion      | 10 (16.1%)  | 2 (10.0%)   | 0.50  |
| Rhinorrhea            | 1 (1.6%)    | 2 (10.0%)   | 0.082 |
| Headache              | 21 (34.4%)  | 5 (25.0%)   | 0.43  |
| Cough                 | 42 (67.7%)  | 13 (65.0%)  | 0.82  |
| Sore throat           | 15 (24.2%)  | 3 (15.0%)   | 0.39  |
| Sputum production     | 9 (14.5%)   | 2 (10.0%)   | 0.61  |
| Fatigue               | 26 (41.9%)  | 11 (55.0%)  | 0.31  |
| Hemoptysis            | 1 (1.6%)    | 0 (0.0%)    | 0.57  |
| Shortness of breath   | 41 (66.1%)  | 14 (70.0%)  | 0.75  |
| chest pain            | 21 (33.9%)  | 3 (15.0%)   | 0.11  |
| chest discomfort      | 11 (17.7%)  | 1 (5.0%)    | 0.16  |
| abdominal pain        | 6 (9.7%)    | 2 (10.0%)   | 0.97  |
| Nausea or vomiting    | 23 (37.1%)  | 4 (20.0%)   | 0.16  |
| Diarrhea              | 15 (24.6%)  | 5 (25.0%)   | 0.97  |
| Myalgia or arthralgia | 26 (41.9%)  | 4 (20.0%)   | 0.077 |

|                         |             |             |                  |
|-------------------------|-------------|-------------|------------------|
| Chill                   | 23 (37.1%)  | 4 (20.0%)   | 0.16             |
| loss of taste           | 8 (12.9%)   | 1 (5.0%)    | 0.33             |
| loss of smell           | 7 (11.3%)   | 2 (10.0%)   | 0.87             |
| N_signs, mean (SD)      | 0.45 (0.64) | 0.60 (0.68) | 0.38             |
| N_signs                 |             |             | 0.59             |
| 0                       | 39 (62.9%)  | 10 (50.0%)  |                  |
| 1                       | 18 (29.0%)  | 8 (40.0%)   |                  |
| 2                       | 5 (8.1%)    | 2 (10.0%)   |                  |
| Throat congestion       | 3 (4.8%)    | 0 (0.0%)    | 0.32             |
| Tonsil swelling         | 3 (4.8%)    | 1 (5.0%)    | 0.98             |
| Rash                    | 2 (3.2%)    | 1 (5.0%)    | 0.71             |
| Abnormal lung sounds    | 18 (30.0%)  | 9 (45.0%)   | 0.22             |
| N_chronic, mean (SD)    | 1.16 (1.23) | 2.20 (1.24) | <b>0.002</b>     |
| N_chronic               |             |             | <b>0.040</b>     |
| 0                       | 25 (40.3%)  | 2 (10.0%)   |                  |
| 1                       | 14 (22.6%)  | 2 (10.0%)   |                  |
| 2                       | 15 (24.2%)  | 10 (50.0%)  |                  |
| 3                       | 5 (8.1%)    | 3 (15.0%)   |                  |
| 4                       | 2 (3.2%)    | 2 (10.0%)   |                  |
| 5                       | 1 (1.6%)    | 1 (5.0%)    |                  |
| N_chronic1              |             |             | <b>0.010</b>     |
| 0                       | 25 (40.3%)  | 2 (10.0%)   |                  |
| 1                       | 14 (22.6%)  | 2 (10.0%)   |                  |
| 2                       | 15 (24.2%)  | 10 (50.0%)  |                  |
| 33                      | 8 (12.9%)   | 6 (30.0%)   |                  |
| COPD                    | 1 (1.6%)    | 1 (5.0%)    | 0.39             |
| DM                      | 17 (27.4%)  | 15 (75.0%)  | <b>&lt;0.001</b> |
| HTN                     | 27 (43.5%)  | 13 (65.0%)  | 0.095            |
| Coronary artery disease | 4 (6.5%)    | 4 (20.0%)   | 0.076            |
| Cerebrovascular disease | 3 (4.8%)    | 3 (15.0%)   | 0.13             |
| Cancer                  | 1 (1.6%)    | 0 (0.0%)    | 0.57             |
| CKD                     | 4 (6.5%)    | 3 (15.0%)   | 0.23             |
| Cirrhosis               | 1 (1.6%)    | 0 (0.0%)    | 0.57             |
| Asthma                  | 3 (4.8%)    | 1 (5.0%)    | 0.98             |
| Rheumatological         | 1 (1.6%)    | 0 (0.0%)    | 0.57             |
| IBD                     | 0 (0.0%)    | 1 (5.0%)    | 0.076            |
| HIV+                    | 0 (0.0%)    | 1 (5.0%)    | 0.076            |
| Hepatitis               | 2 (3.2%)    | 0 (0.0%)    | 0.42             |
| Hypothyroidism          | 8 (13.1%)   | 2 (10.0%)   | 0.71             |
| Hyperthyroidism         |             |             |                  |
| 0                       | 61 (98.4%)  | 20 (100.0%) |                  |
|                         | 1 (1.6%)    | 0 (0.0%)    |                  |

|                                    |            |            |                  |
|------------------------------------|------------|------------|------------------|
| Ground-glass opacities             |            |            | <b>0.031</b>     |
| 0                                  | 26 (41.9%) | 5 (25.0%)  |                  |
| 1                                  | 27 (43.5%) | 15 (75.0%) |                  |
| 99                                 | 9 (14.5%)  | 0 (0.0%)   |                  |
| Local patchy shadowing             |            |            | 0.17             |
| 0                                  | 30 (48.4%) | 10 (50.0%) |                  |
| 1                                  | 23 (37.1%) | 10 (50.0%) |                  |
| 99                                 | 9 (14.5%)  | 0 (0.0%)   |                  |
| Diffuse patchy shadowing           |            |            | <b>&lt;0.001</b> |
| 0                                  | 40 (64.5%) | 4 (20.0%)  |                  |
| 1                                  | 13 (21.0%) | 16 (80.0%) |                  |
| 99                                 | 9 (14.5%)  | 0 (0.0%)   |                  |
| Pleural effusion                   |            |            | <b>&lt;0.001</b> |
| 0                                  | 47 (75.8%) | 8 (40.0%)  |                  |
| 1                                  | 6 (9.7%)   | 12 (60.0%) |                  |
| 99                                 | 9 (14.5%)  | 0 (0.0%)   |                  |
| Interstitial abnormalities         |            |            | <b>0.002</b>     |
| 0                                  | 35 (56.5%) | 4 (20.0%)  |                  |
| 0?                                 | 1 (1.6%)   | 0 (0.0%)   |                  |
| 1                                  | 15 (24.2%) | 15 (75.0%) |                  |
| ?? Looks like it but not mentioned | 1 (1.6%)   | 0 (0.0%)   |                  |
| na                                 | 10 (16.1%) | 1 (5.0%)   |                  |
| CT_Ground-glass opacities          |            |            | 0.48             |
| 1                                  | 11 (17.7%) | 5 (25.0%)  |                  |
| na                                 | 51 (82.3%) | 15 (75.0%) |                  |
| CT_Local patchy shadowing          |            |            | 0.83             |
| 0                                  | 4 (6.5%)   | 2 (10.0%)  |                  |
| 1                                  | 5 (8.1%)   | 2 (10.0%)  |                  |
| na                                 | 53 (85.5%) | 16 (80.0%) |                  |
| CT_Diffuse patchy shadowing        |            |            | 0.14             |
| 0                                  | 6 (9.7%)   | 1 (5.0%)   |                  |
| 1                                  | 2 (3.2%)   | 3 (15.0%)  |                  |
| na                                 | 54 (87.1%) | 16 (80.0%) |                  |
| CT_Pleural effusion                |            |            | 0.18             |
| 0                                  | 6 (9.7%)   | 1 (5.0%)   |                  |
| 1                                  | 4 (6.5%)   | 4 (20.0%)  |                  |
| na                                 | 52 (83.9%) | 15 (75.0%) |                  |
| CT_Interstitial abnormalities      |            |            | 0.34             |



|                     |             |             |                  |
|---------------------|-------------|-------------|------------------|
| 0                   | 5 (8.1%)    | 2 (10.0%)   |                  |
| 1                   | 5 (8.1%)    | 2 (10.0%)   |                  |
| 60                  | 0 (0.0%)    | 1 (5.0%)    |                  |
| na                  | 52 (83.9%)  | 15 (75.0%)  |                  |
| N_med, mean (SD)    | 2.26 (2.09) | 3.20 (2.21) | 0.088            |
| N_med               |             |             | 0.062            |
| 0                   | 16 (25.8%)  | 1 (5.0%)    |                  |
| 1                   | 15 (24.2%)  | 2 (10.0%)   |                  |
| 2                   | 6 (9.7%)    | 7 (35.0%)   |                  |
| 3                   | 4 (6.5%)    | 2 (10.0%)   |                  |
| 4                   | 11 (17.7%)  | 4 (20.0%)   |                  |
| 5                   | 5 (8.1%)    | 2 (10.0%)   |                  |
| 6                   | 3 (4.8%)    | 1 (5.0%)    |                  |
| 7                   | 2 (3.2%)    | 0 (0.0%)    |                  |
| 10                  | 0 (0.0%)    | 1 (5.0%)    |                  |
| N_med1              |             |             | <b>0.048</b>     |
| 0                   | 16 (25.8%)  | 1 (5.0%)    |                  |
| 1                   | 15 (24.2%)  | 2 (10.0%)   |                  |
| 2                   | 6 (9.7%)    | 7 (35.0%)   |                  |
| 3                   | 4 (6.5%)    | 2 (10.0%)   |                  |
| 4                   | 11 (17.7%)  | 4 (20.0%)   |                  |
| 55                  | 10 (16.1%)  | 4 (20.0%)   |                  |
| Remdesivir          | 1 (1.6%)    | 3 (15.0%)   | <b>0.016</b>     |
| Hydroxychloroquine  | 9 (14.5%)   | 6 (30.0%)   | 0.12             |
| azithromycin        | 41 (66.1%)  | 13 (65.0%)  | 0.93             |
| Statin              | 15 (24.2%)  | 9 (45.0%)   | <b>0.075</b>     |
| Corticosteroid      | 18 (29.0%)  | 7 (35.0%)   | 0.61             |
| ACEi/ARB            | 8 (12.9%)   | 2 (10.0%)   | 0.73             |
| Vit C               | 21 (33.9%)  | 3 (15.0%)   | 0.11             |
| Zinc                | 18 (29.0%)  | 3 (15.0%)   | 0.21             |
| Vitamin D           | 9 (14.5%)   | 5 (25.0%)   | 0.28             |
| Vasopressors        | 0 (0.0%)    | 9 (45.0%)   | <b>&lt;0.001</b> |
| Tocilizumab         | 0 (0.0%)    | 2 (10.0%)   | <b>0.012</b>     |
| convalescent plasma | 0 (0.0%)    | 2 (10.0%)   | <b>0.012</b>     |

SD: standard  
deviation;  
IQR: inter-quartile  
range
